# Supplementary material for: Integrated glycomics strategy for the evaluation of glycosylation alterations in salivary proteins associated with type 2 diabetes mellitus
Source: PubMed Central journal article supplement — RSC Adv. 2020 Nov 1;10(65):39739–52. doi: 10.1039/d0ra05466f (PMC9057417; doi:10.1039/d0ra05466f), 2020-11-01
Supplement: RA-010-D0RA05466F-s001.pdf [file RA-010-D0RA05466F-s001.pdf]

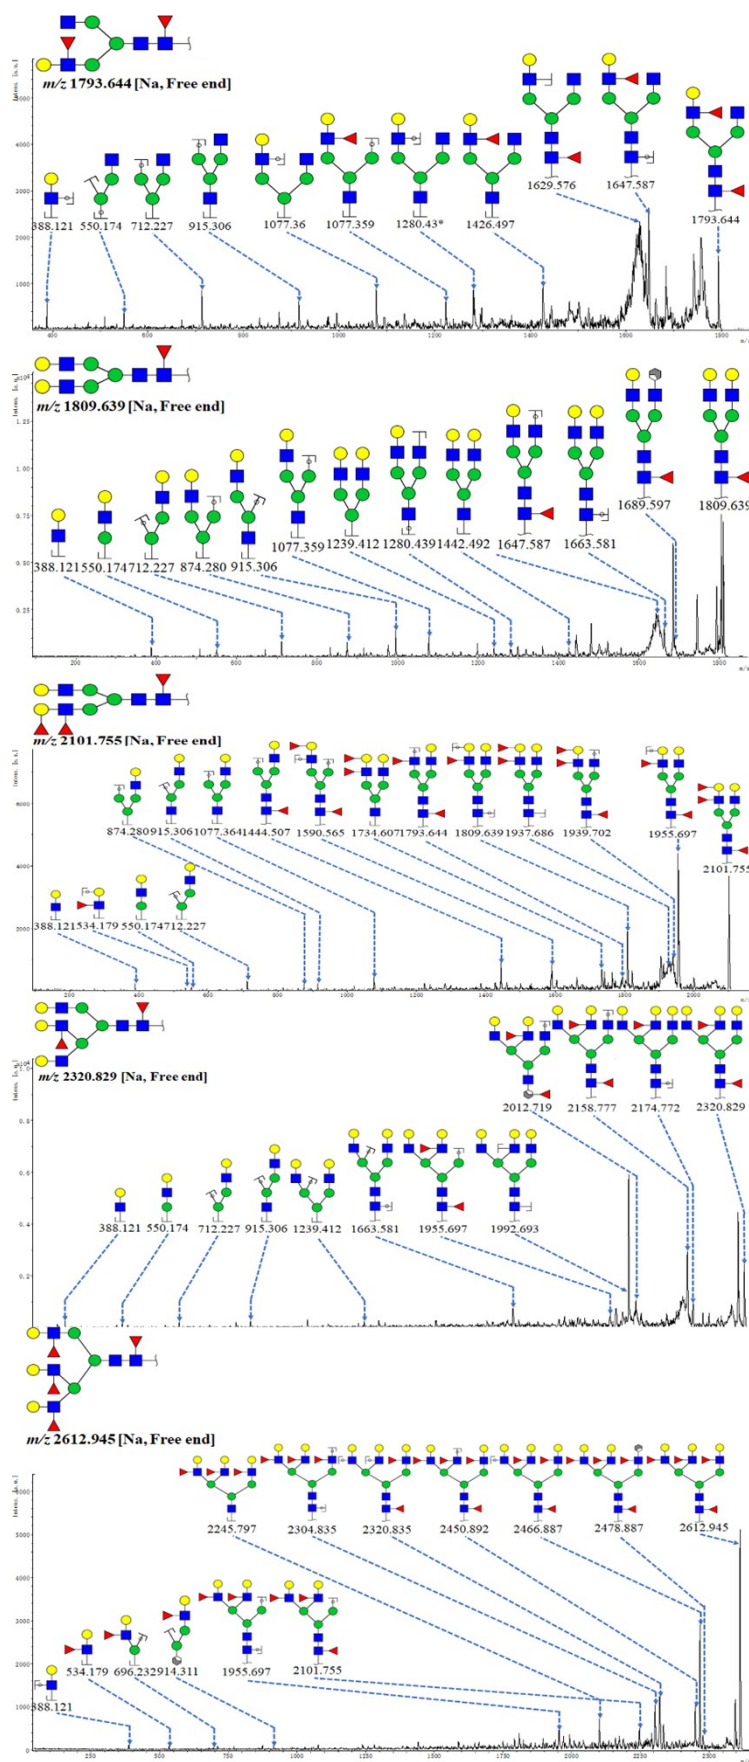

Figure S1

**Table. S1 The normalized fluorescence intensities from HV and patients with T2DM in discovery and validation cohort by the lectin microarray analysis based on data of 37 lectins<sup>a</sup>**

| Lectin  | Specificity                                                                                                  | Discovery cohort    |                     | Validation cohort   |                     |
|---------|--------------------------------------------------------------------------------------------------------------|---------------------|---------------------|---------------------|---------------------|
|         |                                                                                                              | HV                  | T2DM                | HV                  | T2DM                |
| Jacalin | Gal $\beta$ 1-3GalNAc $\alpha$ -Ser/Thr(T), GlcNAc $\beta$ 1-3-GalNAc $\alpha$ -Ser/Thr(Core3), sialyl-T(ST) | 0.071 (0.051-0.090) | 0.030 (0.026-0.033) | 0.066 (0.046-0.086) | 0.033 (0.030-0.037) |
| ECA     | Gal $\beta$ -1,4GlcNAc (type II), Gal $\beta$ 1-3GlcNAc (type I)                                             | 0.017 (0.012-0.021) | 0.022 (0.018-0.025) | 0.019 (0.013-0.025) | 0.024 (0.022-0.027) |
| HHL     | High-Mannose, Man $\alpha$ 1-3Man, Man $\alpha$ 1-6Man, Man5-GlcNAc2-Asn                                     | 0.027 (0.022-0.033) | 0.019 (0.017-0.022) | 0.029 (0.022-0.036) | 0.021 (0.019-0.024) |
| WFA     | Terminating in GalNAc $\alpha$ / $\beta$ 1-3/6Gal                                                            | 0.027 (0.022-0.033) | 0.025 (0.018-0.031) | 0.029 (0.023-0.034) | 0.023 (0.016-0.030) |
| GSL-II  | GlcNAc and agalactosylated tri/tetra antennary glycans                                                       | 0.021 (0.015-0.027) | 0.038 (0.033-0.044) | 0.021 (0.016-0.025) | 0.034 (0.031-0.037) |
| MAL-II  | Sia $\alpha$ 2-3Gal $\beta$ 1-4Glc(NAc)/Glc, Sia $\alpha$ 2-3Gal, Sia $\alpha$ 2-3, Sia $\alpha$ 2-3GalNAc   | 0.017 (0.013-0.021) | 0.015 (0.012-0.018) | 0.012 (0.010-0.015) | 0.019 (0.017-0.021) |
| PHA-E   | Bisecting GlcNAc, biantennary complex-type N-glycan                                                          | 0.029 (0.023-0.036) | 0.019 (0.017-0.022) | 0.025 (0.019-0.031) | 0.018 (0.016-0.019) |
| PTL-I   | GalNAc, GalNAc $\alpha$ -1,3Gal, GalNAc $\alpha$ -1,3Gal $\beta$ -1,3/4Glc                                   | 0.009 (0.006-0.012) | 0.010 (0.006-0.013) | 0.008 (0.006-0.011) | 0.009 (0.007-0.011) |
| SJA     | Terminal in GalNAc and Gal, anti-A and anti-B human blood group                                              | 0.010 (0.007-0.012) | 0.011 (0.008-0.015) | 0.010 (0.008-0.012) | 0.011 (0.009-0.014) |
| PNA     | Gal $\beta$ 1-3GalNAc $\alpha$ -Ser/Thr(T)                                                                   | 0.020 (0.016-0.025) | 0.025 (0.021-0.028) | 0.020 (0.015-0.025) | 0.028 (0.024-0.031) |

|        |                                                                                        |                     |                     |                     |                     |
|--------|----------------------------------------------------------------------------------------|---------------------|---------------------|---------------------|---------------------|
| EEL    | Gal $\alpha$ 1-3(Fuca1-2)Gal (blood group B antigen)                                   | 0.028 (0.024-0.031) | 0.021 (0.017-0.025) | 0.028 (0.023-0.033) | 0.039 (0.035-0.042) |
| AAL    | Fuca1-6 GlcNAc(core fucose), Fuca1-3(Gal $\beta$ 1-4)GlcNAc                            | 0.052 (0.039-0.065) | 0.027 (0.024-0.029) | 0.053 (0.040-0.067) | 0.035 (0.032-0.038) |
| LTL    | Fuca1-3Gal $\beta$ 1-4GlcNAc, Fuca1-anti-H blood group specificity                     | 0.014 (0.010-0.018) | 0.016 (0.013-0.019) | 0.015 (0.012-0.018) | 0.015 (0.012-0.017) |
| MPL    | Gal $\beta$ 1-3GalNAc, GalNAc                                                          | 0.017 (0.014-0.020) | 0.017 (0.013-0.020) | 0.015 (0.013-0.018) | 0.021 (0.019-0.023) |
| LEL    | Gal $\beta$ -1,4GlcNAc(LacNAc) and poly LacNAc                                         | 0.012 (0.008-0.015) | 0.063 (0.053-0.072) | 0.012 (0.009-0.015) | 0.057 (0.053-0.062) |
| GSL-I  | $\alpha$ GalNAc, $\alpha$ Gal, anti-A and B                                            | 0.016 (0.012-0.019) | 0.021 (0.017-0.025) | 0.014 (0.011-0.016) | 0.025 (0.022-0.028) |
| DBA    | $\alpha$ GalNAc, Tn antigen, GalNAc $\alpha$ 1-3((Fuca1-2))Gal (blood group A antigen) | 0.016 (0.013-0.019) | 0.020 (0.018-0.023) | 0.023 (0.017-0.028) | 0.017 (0.015-0.020) |
| LCA    | Fuca-1,6GlcNAc, $\alpha$ -D-Man, $\alpha$ -D-Glc                                       | 0.064 (0.051-0.078) | 0.104 (0.083-0.126) | 0.073 (0.056-0.090) | 0.063 (0.048-0.077) |
| RCA120 | $\beta$ -Gal, Gal $\beta$ 1-3GlcNAc (type I)                                           | 0.042 (0.029-0.054) | 0.015 (0.010-0.020) | 0.043 (0.030-0.056) | 0.016 (0.012-0.019) |
| STL    | Trimers and tetramers of GlcNAc, core (GlcNAc) of N-glycan                             | 0.045 (0.038-0.052) | 0.023 (0.017-0.029) | 0.052 (0.039-0.066) | 0.015 (0.011-0.018) |
| BS-I   | $\alpha$ -Gal, $\alpha$ -GalNAc, Gal $\alpha$ -1,3Gal, Gal $\alpha$ -1,6Glc            | 0.016 (0.010-0.021) | 0.013 (0.011-0.015) | 0.014 (0.009-0.020) | 0.013 (0.010-0.016) |
| ConA   | High-Mannose, Man $\alpha$ 1-6(Man $\alpha$ 1-3)Man, $\alpha$ Mannose, $\alpha$ Glc    | 0.055 (0.047-0.064) | 0.078 (0.068-0.088) | 0.049 (0.041-0.057) | 0.075 (0.068-0.083) |
| PTL-II | Gal, blood group H, T-antigen                                                          | 0.014 (0.010-0.018) | 0.015 (0.013-0.018) | 0.015 (0.011-0.020) | 0.018 (0.016-0.020) |

|         |                                                                                                                                                 |                     |                     |                     |                     |
|---------|-------------------------------------------------------------------------------------------------------------------------------------------------|---------------------|---------------------|---------------------|---------------------|
| DSA     | (GlcNAc) <sub>2-4</sub>                                                                                                                         | 0.024 (0.019-0.029) | 0.011 (0.007-0.015) | 0.022 (0.018-0.026) | 0.008 (0.005-0.011) |
| SBA     | □α- or β-linked terminal GalNAc, (GalNAc) <sub>n</sub> , GalNAcα1-3Gal, blood-group A                                                           | 0.018 (0.013-0.024) | 0.012 (0.011-0.013) | 0.016 (0.012-0.020) | 0.016 (0.015-0.018) |
| VVA     | Terminal GalNAc, GalNAcα-Ser/Thr(Tn), GalNAcα1-3Gal                                                                                             | 0.032 (0.026-0.038) | 0.075 (0.063-0.088) | 0.034 (0.028-0.040) | 0.083 (0.069-0.096) |
| NPA     | High-Mannose, Manα1-6Man                                                                                                                        | 0.015 (0.011-0.019) | 0.018 (0.014-0.021) | 0.016 (0.011-0.020) | 0.020 (0.017-0.023) |
| PSA     | α-fucose, α-D-Man, α-D-Glc                                                                                                                      | 0.042 (0.019-0.064) | 0.020 (0.016-0.025) | 0.027 (0.013-0.041) | 0.015 (0.013-0.018) |
| ACA     | Galβ1-3GalNAcα-Ser/Thr (T antigen), sialyl-T(ST) tissue staining patterns are markedly different than those obtained with either PNA or Jacalin | 0.043 (0.036-0.049) | 0.040 (0.037-0.042) | 0.048 (0.041-0.055) | 0.051 (0.045-0.056) |
| WGA     | Multivalent Sia and (GlcNAc) <sub>n</sub>                                                                                                       | 0.057 (0.037-0.078) | 0.046 (0.038-0.054) | 0.062 (0.036-0.087) | 0.039 (0.033-0.046) |
| UEA-I   | Fuca1-2Galβ1-4Glc(NAc)                                                                                                                          | 0.029 (0.023-0.036) | 0.017 (0.014-0.020) | 0.036 (0.026-0.046) | 0.021 (0.015-0.026) |
| PWM     | (GlcNAc) <sub>n</sub> and polyLacNAc                                                                                                            | 0.026 (0.021-0.031) | 0.024 (0.020-0.028) | 0.021 (0.018-0.025) | 0.032 (0.029-0.035) |
| MAL-I   | Galβ-1,4GlcNAc(LacNAc)                                                                                                                          | 0.009 (0.006-0.011) | 0.019 (0.016-0.022) | 0.009 (0.007-0.011) | 0.016 (0.014-0.018) |
| GNA     | Manα1-3Man                                                                                                                                      | 0.023 (0.020-0.027) | 0.014 (0.011-0.017) | 0.024 (0.017-0.030) | 0.013 (0.012-0.015) |
| BPL     | Galβ1-3GalNAc, Terminal GalNAc                                                                                                                  | 0.016 (0.012-0.020) | 0.030 (0.026-0.033) | 0.013 (0.010-0.016) | 0.025 (0.020-0.030) |
| PHA-E+L | Bisecting GlcNAc, bi-antennary N-glycans, tri- and tetra-antennary complex-type N-glycan                                                        | 0.011 (0.008-0.014) | 0.004 (0.003-0.006) | 0.010 (0.007-0.012) | 0.006 (0.004-0.008) |

|     |                  |                      |                     |                     |                     |
|-----|------------------|----------------------|---------------------|---------------------|---------------------|
| SNA | Sia2-6Gal/GalNAc | 0.016 (0.013- 0.019) | 0.024 (0.022-0.027) | 0.017 (0.014-0.020) | 0.027 (0.024-0.030) |
|-----|------------------|----------------------|---------------------|---------------------|---------------------|

<sup>a</sup> The normalization fluorescence intensities of each lectin represented as mean with 95% confidence interval.

**Table. S2 Altered glycopattern of salivary glycoproteins between HV and T2DM patients in validation cohort based on data of lectins giving significant differences<sup>a</sup>**

| Category                   | Lectin  | Specificity                                                | HV                  | T2DM                | Foldchange <sup>b</sup> |         |
|----------------------------|---------|------------------------------------------------------------|---------------------|---------------------|-------------------------|---------|
| <b>LacNAc</b>              | LEL     | Galβ-1,4GlcNAc(LacNAc) and poly LacNAc                     | 0.012 (0.009-0.015) | 0.057 (0.053-0.062) | 4.845***                |         |
| <b>Terminal GalNAc</b>     | VVA     | Terminal GalNAc, GalNAcα-Ser/Thr(Tn), GalNAcα1-3Gal        | 0.034 (0.028-0.040) | 0.083 (0.069-0.096) | 2.445***                |         |
| <b>T/ sialyl T antigen</b> | Jacalin | Galβ1-3GalNAcα-Ser/Thr(T),<br>Ser/Thr(Core3), sialyl-T(ST) | GlcNAcβ1-3-GalNAcα- | 0.066 (0.046-0.086) | 0.033 (0.030-0.037)     | 0.491** |
| <b>Gal and GalNAc</b>      | RCA120  | β-Gal, Galβ1-3GlcNAc (type I)                              | 0.043 (0.030-0.056) | 0.016 (0.012-0.019) | 0.362***                |         |
| <b>Oligomers of GlcNAc</b> | STL     | Trimers and tetramers of GlcNAc, core (GlcNAc) of N-glycan | 0.052 (0.039-0.066) | 0.015 (0.011-0.018) | 0.366***                |         |
|                            | DSA     | (GlcNAc) <sub>2-4</sub>                                    | 0.022 (0.018-0.026) | 0.008 (0.005-0.011) | 0.281***                |         |

<sup>a</sup> The normalization fluorescence intensities of each lectin represented as mean with 95% confidence interval.

b: \*  $p < 0.05$ , \*\*  $p < 0.01$ , and \*\*\*  $p < 0.001$

**Table. S3 Proposed structures for N-glycan signals detected in isolated salivary glycoproteins from HV and patients with T2DM**

| No | Calculated m/z | Ion type | Predicted components | Proposed structure <sup>a</sup> | N-glycan | Relative intensities of N-glycans |         |
|----|----------------|----------|----------------------|---------------------------------|----------|-----------------------------------|---------|
|    |                |          |                      |                                 |          | HV(%)                             | T2DM(%) |

|   |          |    |                    |  |        |        |
|---|----------|----|--------------------|--|--------|--------|
| 1 | 1590.565 | Na | Hex4HexNAc3dHex2   |  | 15.567 | 24.536 |
| 2 | 1647.586 | Na | Hex4HexNAc4dHex1   |  | ND     | 14.490 |
| 3 | 1688.613 | Na | Hex3HexNAc5dHex1   |  | ND     | 14.926 |
| 4 | 1705.561 | H  | Hex4HexNAc4S1dHex1 |  | 15.074 | ND     |
| 5 | 1736.623 | Na | Hex4HexNAc3dHex3   |  | 23.095 | 11.651 |
| 6 | 1752.618 | Na | Hex5HexNAc3dHex2   |  | ND     | 9.530  |
| 7 | 1793.644 | Na | Hex4HexNAc4dHex2   |  | 30.949 | 14.696 |
| 8 | 1809.639 | Na | Hex5HexNAc4dHex1   |  | ND     | 31.281 |

|    |          |    |                                       |                                                                                       |         |         |
|----|----------|----|---------------------------------------|---------------------------------------------------------------------------------------|---------|---------|
| 9  | 1850.666 | Na | Hex4HexNAc5dHex1                      | 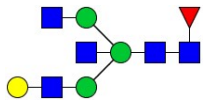   | ND      | 10.832  |
| 10 | 1939.702 | Na | Hex4HexNAc4dHex3                      |    | 30.112  | 9.331   |
| 11 | 1956.742 | H  | Hex3HexNAc5( $\alpha$ 2,3)NeuAc1dHex1 |    | 42.020  | 69.623  |
| 12 | 1984.773 | H  | Hex3HexNAc5( $\alpha$ 2,6)NeuAc1dHex1 |    | ND      | 11.422  |
| 13 | 1996.724 | Na | Hex4HexNAc5dHex2                      |    | ND      | 8.431   |
| 14 | 2012.719 | Na | Hex5HexNAc5dHex1                      |    | ND      | 13.422  |
| 15 | 2020.747 | H  | Hex5HexNAc3( $\alpha$ 2,3)NeuAc1dHex2 |  | 10.758  | ND      |
| 16 | 2101.755 | Na | Hex5HexNAc4dHex3                      |  | 100.000 | 100.000 |
| 17 | 2121.795 | H  | Hex6HexNAc4( $\alpha$ 2,6)NeuAc1      |  | 11.190  | ND      |

|    |          |    |                              |                                                                                      |        |        |
|----|----------|----|------------------------------|--------------------------------------------------------------------------------------|--------|--------|
| 18 | 2158.777 | Na | Hex5HexNAc5dHex2             | 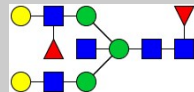  | 10.909 | 13.713 |
| 19 | 2174.771 | Na | Hex6HexNAc5dHex1             |   | ND     | 12.953 |
| 20 | 2247.813 | Na | Hex5HexNAc4dHex4             |   | 63.345 | 53.662 |
| 21 | 2304.834 | Na | Hex5HexNAc5dHex3             |   | 12.414 | 11.644 |
| 22 | 2320.829 | Na | Hex5HexNAc5dHex3             |   | 11.847 | 19.707 |
| 23 | 2393.846 | Na | Hex7HexNAc6                  |   | 29.823 | 27.223 |
| 24 | 2449.933 | H  | Hex3HexNAc6(α2,6)NeuAc2dHex1 |  | 6.555  | 4.749  |



|    |          |    |                                                            |                                                                                       |        |        |
|----|----------|----|------------------------------------------------------------|---------------------------------------------------------------------------------------|--------|--------|
| 25 | 2466.887 | Na | Hex6HexNAc5dHex3                                           | 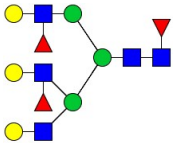   | 19.021 | 24.646 |
| 26 | 2612.945 | Na | Hex6HexNAc5dHex4                                           |    | 20.156 | 26.956 |
| 27 | 2758.978 | Na | Hex8HexNAc7                                                |    | 12.692 | 18.502 |
| 28 | 2905.097 | H  | Hex6HexNAc5( $\alpha$ 2,3)NeuAc2( $\alpha$ 2,6)NeuAc1      |    | 10.725 | 13.175 |
| 29 | 3051.155 | H  | Hex6HexNAc5( $\alpha$ 2,3)NeuAc2( $\alpha$ 2,6)NeuAc1dHex1 |  | ND     | 6.360  |

● Gal ■ GalNAc ■ GlcNAc ● Mannose ▲ Fucose ◆  $\alpha$ 2,3-NeuAc ◆  $\alpha$ 2,6-NeuAc

<sup>a</sup> Proposed glycan structure, monosaccharides were represented according to MS-tools from the GlycoWorkbench software.

**Table. S4 Proposed structures for O-glycan signals detected in isolated salivary glycoproteins from HV and patients with T2DM**

| No | Calculated m/z | Ion type | Predicted components         | Proposed N-glycan structure <sup>a</sup>                                                                                                                                       | Relative intensities of O-glycans |          |
|----|----------------|----------|------------------------------|--------------------------------------------------------------------------------------------------------------------------------------------------------------------------------|-----------------------------------|----------|
|    |                |          |                              |                                                                                                                                                                                | HV (%)                            | T2DM (%) |
| 1  | 478.132        | Na       | Hex1HexNAc1                  | 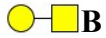                                                                                            | 7.518                             | ND       |
| 2  | 505.158        | Na       | HexNAc2                      |                                                                                             | 38.668                            | 41.527   |
| 3  | 571.213        | H        | Hex1( $\alpha$ 2,6)NeuAc1    |                                                                                             | 17.696                            | 36.336   |
| 4  | 598.240        | H        | HexNAc1( $\alpha$ 2,3)NeuAc1 |                                                                                             | 6.739                             | 12.676   |
| 5  | 612.240        | H        | HexNAc1( $\alpha$ 2,3)NeuAc1 |                                                                                             | 100.000                           | 12.171   |
| 6  | 637.170        | H        | Hex1( $\alpha$ 2,6)NeuAc1S1  |                                                                                             | 7.257                             | ND       |
| 7  | 645.229        | H        | Hex1HexNAc2                  |                                                                                             | 11.320                            | ND       |
| 8  | 713.217        | Na       | Hex2( $\alpha$ 2,3)NeuAc1    |                                                                                            | 11.103                            | 16.792   |
| 9  | 725.186        | H        | Hex1HexNAc2S1                | <br> | ND                                | 7.485    |

|    |          |    |                                           |                                                                                                                                                                                |        |         |
|----|----------|----|-------------------------------------------|--------------------------------------------------------------------------------------------------------------------------------------------------------------------------------|--------|---------|
| 10 | 768.243  | Na | Hex1HexNAc1( $\alpha$ 2,3)NeuAc1          |                                                                                                                                                                                | 11.986 | 35.333  |
| 11 | 837.301  | Na | HexNAc2( $\alpha$ 2,6)NeuAc1              | 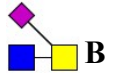                                                                                            | 12.408 | 18.595  |
| 12 | 851.281  | Na | Ac1HexNAc( $\alpha$ 2,3)2NeuAc1           |                                                                                             | 16.717 | 15.088  |
| 13 | 868.296  | Na | HexNAc3dHex1                              |                                                                                             | 6.422  | 13.063  |
| 14 | 884.291  | Na | Hex1HexNAc3                               |                                                                                             | 64.770 | 100.000 |
| 15 | 914.301  | Na | Hex1HexNAc1( $\alpha$ 2,3)NeuAc1<br>dHex1 |                                                                                             | 7.561  | 12.735  |
| 16 | 928.332  | Na | Hex1HexNAc1( $\alpha$ 2,6)NeuAc1<br>dHex1 |                                                                                             | 7.224  | 10.339  |
| 17 | 981.196  | H  | Hex2HexNAc2S2                             |                                                                                            | 5.656  | 8.5186  |
| 18 | 995.346  | H  | Hex2( $\alpha$ 2,3)NeuAc2                 |                                                                                           | 50.821 | 48.588  |
| 19 | 1008.367 | H  | Hex1HexNAc3dHex1                          |                                                                                           | 11.611 | 19.463  |
| 20 | 1024.362 | H  | Hex2HexNAc3                               | <br> | 21.473 | 18.375  |

|    |          |    |                                           |                                                                                       |        |        |
|----|----------|----|-------------------------------------------|---------------------------------------------------------------------------------------|--------|--------|
| 21 | 1037.280 | Na | Hex1HexNAc2( $\alpha$ 2,3)NeuAc1<br>S1    |                                                                                       | ND     | 4.102  |
| 22 | 1051.280 | Na | Hex1HexNAc2( $\alpha$ 2,3)NeuAc1<br>S1    |    | 50.187 | 78.874 |
| 23 | 1069.279 | Na | Hex2HexNAc2S1dHex1                        |    | ND     | 5.179  |
| 24 | 1095.399 | H  | Hex1HexNAc2( $\alpha$ 2,3)NeuAc1<br>dHex1 |    | 7.251  | 5.179  |
| 25 | 1121.380 | Na | Hex2HexNAc2dHex2                          |    | 5.500  | 11.368 |
| 26 | 1133.376 | Na | Hex2HexNAc2( $\alpha$ 2,3)NeuAc1          |    | ND     | 5.897  |
| 27 | 1141.443 | Na | HexNAc2( $\alpha$ 2,6)NeuAc2              |    | 6.677  | 5.068  |
| 28 | 1151.375 | Na | Hex3HexNAc2dHex1                          |  | 6.670  | 7.576  |
| 29 | 1166.451 | H  | Hex1HexNAc3( $\alpha$ 2,6)NeuAc1          |  | 57.772 | 91.382 |

|    |          |    |                                             |  |        |        |
|----|----------|----|---------------------------------------------|--|--------|--------|
| 30 | 1197.377 | Na | Hex1HexNAc2( $\alpha$ 2,3)NeuAc1<br>S1dHex1 |  | 11.009 | 12.500 |
| 31 | 1211.369 | Na | Hex1HexNAc2( $\alpha$ 2,6)NeuAc1<br>S1dHex1 |  | 5.500  | 9.609  |
| 32 | 1279.434 | Na | Hex2HexNAc2( $\alpha$ 2,3)NeuAc1<br>dHex1   |  | 8.642  | 24.486 |
| 33 | 1309.459 | Na | Hex3HexNAc2( $\alpha$ 2,3)NeuAc1            |  | 6.621  | 11.573 |
| 34 | 1334.491 | Na | Hex1HexNAc3( $\alpha$ 2,6)NeuAc1<br>dHex1   |  | ND     | 18.719 |
| 35 | 1449.554 | Na | Hex1HexNAc2( $\alpha$ 2,6)NeuAc2<br>dHex1   |  | ND     | 16.547 |
| 36 | 1562.470 | Na | Hex2HexNAc3( $\alpha$ 2,3)NeuAc1<br>S1dHex1 |  | ND     | 4.915  |

Gal
  GalNAc
  GlcNAc
  Mannose
  Fucose
   $\alpha$ 2,3-NeuAc
   $\alpha$ 2,6-NeuAc

<sup>a</sup> Proposed glycan structure, monosaccharides were represented according to MS-tools from the GlycoWorkbench software. In O-glycans, the reducing end A or B was residue of  $-\text{CH}_2\text{COOH}$  from serine or residue of  $-\text{CH}(\text{CH}_3)\text{COOH}$  from threonine.
